# Supplementary material for: Less Is More – Estimation of the Number of Strides Required to Assess Gait Variability in Spatially Confined Settings
Source: PubMed Central journal article supplement (PMC6348278; doi:10.3389/fnagi.2018.00435), 2019-01-21
Supplement: Table_1.pdf [file Table_1.pdf]

**Supplementary Table 1** - Consistency of gait parameters and their coefficients of variation (CoV) across straight walking segments

| <b>Healthy elderly</b>       |            | <b>3 straight walking segments<br/>(each 20 meters)</b> |                                           |                            |
|------------------------------|------------|---------------------------------------------------------|-------------------------------------------|----------------------------|
|                              | <i>ICC</i> | <i>p</i>                                                | <i>Range of segment means (min - max)</i> | <i>SD of segment means</i> |
| <b>HE Stride length</b>      | 0.98       | <0.0001                                                 | 86.02 – 86.20                             | 0.10                       |
| <b>HE CoV Stride length</b>  | 0.61       | <0.0001                                                 | 1.78 – 2.16                               | 0.21                       |
| <b>HE Stride time</b>        | 0.94       | <0.0001                                                 | 1.02 - 1.03                               | 0.01                       |
| <b>HE CoV Stride time</b>    | 0.28       | <0.0001                                                 | 1.48 – 1.90                               | 0.16                       |
| <b>Movement disorders</b>    |            | <b>5 straight walking segments<br/>(each 10 meters)</b> |                                           |                            |
|                              | <i>ICC</i> | <i>p</i>                                                | <i>Range of segment means (min - max)</i> | <i>SD of segment means</i> |
| <b>MD Stride length</b>      | 0.97       | <0.0001                                                 | 76.76 – 77.37                             | 0.46                       |
| <b>MD CoV Stride length</b>  | 0.69       | <0.0001                                                 | 2.86 - 3.37                               | 0.75                       |
| <b>MD Stride time</b>        | 0.97       | <0.0001                                                 | 1.02 – 1.04                               | 0.01                       |
| <b>MD CoV Stride time</b>    | 0.62       | <0.0001                                                 | 2.78 – 3.76                               | 0.46                       |
|                              |            |                                                         |                                           |                            |
| <b>ATX Stride length</b>     | 0.96       | <0.0001                                                 | 78.16 – 78.93                             | 0.30                       |
| <b>ATX CoV Stride length</b> | 0.73       | <0.0001                                                 | 4.33 - 6.01                               | 0.75                       |
| <b>ATX Stride time</b>       | 0.98       | <0.0001                                                 | 1.10 – 1.14                               | 0.02                       |
| <b>ATX CoV Stride time</b>   | 0.73       | <0.0001                                                 | 4.00 – 6.14                               | 0.93                       |
|                              |            |                                                         |                                           |                            |
| <b>ET Stride length</b>      | 0.98       | <0.0001                                                 | 75.64 – 76.69                             | 0.43                       |
| <b>ET CoV Stride length</b>  | 0.20       | 0.028                                                   | 2.15 – 2.63                               | 0.18                       |
| <b>ET Stride time</b>        | 0.97       | <0.0001                                                 | 1.01 – 1.02                               | 0.003                      |
| <b>ET CoV Stride time</b>    | 0.22       | 0.019                                                   | 2.87 – 3.05                               | 0.08                       |
|                              |            |                                                         |                                           |                            |
| <b>PD Stride length</b>      | 0.97       | <0.0001                                                 | 76.76 – 77.37                             | 0.25                       |
| <b>PD CoV Stride length</b>  | 0.69       | <0.0001                                                 | 2.86 – 3.37                               | 0.21                       |
| <b>PD Stride time</b>        | 0.97       | <0.0001                                                 | 1.02 – 1.04                               | 0.01                       |
| <b>PD CoV Stride time</b>    | 0.62       | <0.0001                                                 | 2.78 – 3.76                               | 0.46                       |
|                              |            |                                                         |                                           |                            |

ATX – patients with ataxia, CoV – coefficient of variation; ET – patients with essential tremor; GC – gait cycle; HE – healthy elderly; ICC – intraclass coefficient; MD – neurological disorders with motor impairment; PD – patients with Parkinson’s disease; SD – standard deviation

**Supplementary Table 2** - Consistency of gait parameters and their coefficients of variation (CoV) across straight walking segments per disease subgroups AFTER omission of one additional stride before and after turns

| <b>Healthy elderly</b>       |            | <b>3 straight walking segments<br/>(each 20 meters)</b> |                                           |                            |
|------------------------------|------------|---------------------------------------------------------|-------------------------------------------|----------------------------|
|                              | <i>ICC</i> | <i>p</i>                                                | <i>Range of segment means (min - max)</i> | <i>SD of segment means</i> |
| <b>HE Stride length</b>      | 0.98       | <0.0001                                                 | 86.15 – 86.33                             | 0.09                       |
| <b>HE CoV Stride length</b>  | 0.43       | <0.0001                                                 | 1.53 – 1.82                               | 0.13                       |
| <b>HE Stride time</b>        | 0.94       | <0.0001                                                 | 1.016 - 1.027                             | 0.006                      |
| <b>HE CoV Stride time</b>    | 0.24       | <0.0001                                                 | 1.37 – 1.62                               | 0.11                       |
| <b>Movement disorders</b>    |            | <b>5 straight walking segments<br/>(each 10 meters)</b> |                                           |                            |
|                              | <i>ICC</i> | <i>p</i>                                                | <i>Range of segment means (min - max)</i> | <i>SD of segment means</i> |
| <b>MD Stride length</b>      | 0.97       | <0.0001                                                 | 77.10 – 77.62                             | 0.22                       |
| <b>MD CoV Stride length</b>  | 0.79       | <0.0001                                                 | 2.52 – 2.85                               | 0.13                       |
| <b>MD Stride time</b>        | 0.97       | <0.0001                                                 | 1.020 – 1.033                             | 0.006                      |
| <b>MD CoV Stride time</b>    | 0.70       | <0.0001                                                 | 2.14 – 2.86                               | 0.33                       |
| <b>ATX Stride length</b>     | 0.95       | <0.0001                                                 | 76.26 – 77.11                             | 0.33                       |
| <b>ATX CoV Stride length</b> | 0.83       | <0.0001                                                 | 4.13 – 5.31                               | 0.40                       |
| <b>ATX Stride time</b>       | 0.97       | <0.0001                                                 | 1.10 – 1.23                               | 0.014                      |
| <b>ATX CoV Stride time</b>   | 0.75       | <0.0001                                                 | 3.02 – 5.79                               | 0.88                       |
| <b>ET Stride length</b>      | 0.98       | <0.0001                                                 | 78.42 – 79.23                             | 0.27                       |
| <b>ET CoV Stride length</b>  | 0.26       | 0.0067                                                  | 1.85 – 2.14                               | 0.12                       |
| <b>ET Stride time</b>        | 0.95       | <0.0001                                                 | 1.009-1.021                               | 0.004                      |
| <b>ET CoV Stride time</b>    | 0.37       | 0.00053                                                 | 1.70 – 2.30                               | 0.20                       |
| <b>PD Stride length</b>      | 0.96       | <0.0001                                                 | 75.76 – 76.60                             | 0.32                       |
| <b>PD CoV Stride length</b>  | 0.50       | <0.0001                                                 | 1.65 – 2.47                               | 0.34                       |
| <b>PD Stride time</b>        | 0.93       | <0.0001                                                 | 0.98 – 0.99                               | 0.004                      |
| <b>PD CoV Stride time</b>    | 0.17       | 0.051                                                   | 1.49 – 2.40                               | 0.33                       |

ATX – patients with ataxia, CoV – coefficient of variation; ET – patients with essential tremor; GC – gait cycle; HE – healthy elderly; ICC – intraclass coefficient; MD – neurological disorders with motor impairment; PD – patients with Parkinson’s disease; SD – standard deviation

**Supplementary Table 3** – Characteristics of strides before and after turns. Average refers to the means of all 40 gait cycles.

|                                 | Mean  | StD     | p<br>(vs. average) | % of stride values<br>smaller than<br>97.5% of<br>individual mean | Within<br>97.5%-102.5% | % of stride values<br>greater than 102.5%<br>of individual mean |
|---------------------------------|-------|---------|--------------------|-------------------------------------------------------------------|------------------------|-----------------------------------------------------------------|
| <b>HE SL BEFORE [%stature]</b>  | 84.98 | 5.825   | < 0.0001           | 21.25                                                             | 74.06                  | 4.66                                                            |
| <b>HE SL AVERAGE [%stature]</b> | 86.13 | 4.83    | n.a.               | n.a.                                                              | n.a.                   | n.a.                                                            |
| <b>HE SL AFTER [%stature]</b>   | 85.26 | 5.223   | < 0.0001           | 24.07                                                             | 69.14                  | 6.79                                                            |
|                                 |       |         |                    |                                                                   |                        |                                                                 |
| <b>HE ST BEFORE [seconds]</b>   | 1.035 | 0.06897 | < 0.0001           | 4.01                                                              | 68.21                  | 27.78                                                           |
| <b>HE ST AVERAGE [seconds]</b>  | 1.021 | 0.06276 | n.a.               | n.a.                                                              | n.a.                   | n.a.                                                            |
| <b>HE ST AFTER [seconds]</b>    | 1.037 | 0.07288 | < 0.0001           | 5.56                                                              | 61.42                  | 33.02                                                           |
|                                 |       |         |                    |                                                                   |                        |                                                                 |
| <b>MD SL BEFORE [%stature]</b>  | 76.29 | 7.66    | 0.0182             | 22.31                                                             | 69.42                  | 9.02                                                            |
| <b>MD SL AVERAGE [%stature]</b> | 76.99 | 7.04    | n.a.               | n.a.                                                              | n.a.                   | n.a.                                                            |
| <b>MD SL AFTER [%stature]</b>   | 74.85 | 7.81    | <0.0001            | 47.58                                                             | 45.53                  | 7.26                                                            |
|                                 |       |         |                    |                                                                   |                        |                                                                 |
| <b>MD ST BEFORE [seconds]</b>   | 1.045 | 0.110   | 0.2829             | 6.45                                                              | 68.55                  | 25.0                                                            |
| <b>MD ST AVERAGE [seconds]</b>  | 1.035 | 0.116   | n.a.               | n.a.                                                              | n.a.                   | n.a.                                                            |
| <b>MD ST AFTER [seconds]</b>    | 1.068 | 0.130   | 0.0027             | 7.26                                                              | 53.23                  | 39.51                                                           |
|                                 |       |         |                    |                                                                   |                        |                                                                 |

HE – healthy elderly; MD – neurological disorders with motor impairment; StD – standard deviation; *n.a.* – not applicable, as comparisons of strides BEFORE and AFTER turns were made against averages of all strides.

**Supplementary Table 4** – Characteristics of strides before and after turns per disease groups. Average refers to the means of all 40 gait cycles.

|                                  | Mean  | StD  | p<br>(vs. average) | % of stride<br>values smaller<br>than 97.5% of<br>individual mean | Within<br>97.5%-102.5% | % of stride<br>values greater<br>than 102.5% of<br>individual mean |
|----------------------------------|-------|------|--------------------|-------------------------------------------------------------------|------------------------|--------------------------------------------------------------------|
| <b>ATX SL BEFORE [%stature]</b>  | 74.01 | 9.19 | 0.1667             | 42.31                                                             | 42.31                  | 14.81                                                              |
| <b>ATX SL AVERAGE [%stature]</b> | 76.06 | 7.56 | n.a.               | n.a.                                                              | n.a.                   | n.a.                                                               |
| <b>ATX SL AFTER [%stature]</b>   | 73.93 | 8.69 | 0.0514             | 50.00                                                             | 37.04                  | 14.29                                                              |
|                                  |       |      |                    |                                                                   |                        |                                                                    |
| <b>ATX ST BEFORE [seconds]</b>   | 1.12  | 0.19 | 0.5439             | 25.00                                                             | 53.57                  | 21.43                                                              |
| <b>ATX ST AVERAGE [seconds]</b>  | 1.12  | 0.20 | n.a.               | n.a.                                                              | n.a.                   | n.a.                                                               |
| <b>ATX ST AFTER [seconds]</b>    | 1.15  | 0.22 | 0.1697             | 17.86                                                             | 50.00                  | 32.14                                                              |
|                                  |       |      |                    |                                                                   |                        |                                                                    |
| <b>ET SL BEFORE [%stature]</b>   | 76.10 | 7.05 | 0.0021             | 21.43                                                             | 75.00                  | 3.57                                                               |
| <b>ET SL AVERAGE [%stature]</b>  | 78.50 | 6.66 | n.a.               | n.a.                                                              | n.a.                   | n.a.                                                               |
| <b>ET SL AFTER [%stature]</b>    | 78.27 | 7.02 | 0.4689             | 50.00                                                             | 39.29                  | 10.71                                                              |
|                                  |       |      |                    |                                                                   |                        |                                                                    |
| <b>ET ST BEFORE [seconds]</b>    | 1.07  | 0.11 | 0.0061             | 0                                                                 | 78.57                  | 21.43                                                              |
| <b>ET ST AVERAGE [seconds]</b>   | 1.02  | 0.07 | n.a.               | n.a.                                                              | n.a.                   | n.a.                                                               |
| <b>ET ST AFTER [seconds]</b>     | 1.04  | 0.07 | 0.0001             | 0                                                                 | 35.71                  | 64.29                                                              |
|                                  |       |      |                    |                                                                   |                        |                                                                    |
| <b>PD SL BEFORE [%stature]</b>   | 74.08 | 8.23 | 0.001              | 21.43                                                             | 67.86                  | 10.71                                                              |
| <b>PD SL AVERAGE [%stature]</b>  | 76.02 | 7.45 | n.a.               | n.a.                                                              | n.a.                   | n.a.                                                               |
| <b>PD SL AFTER [%stature]</b>    | 75.69 | 7.83 | 0.2364             | 42.86                                                             | 50.00                  | 7.14                                                               |
|                                  |       |      |                    |                                                                   |                        |                                                                    |
| <b>PD ST BEFORE [seconds]</b>    | 1.02  | 0.04 | 0.0224             | 0.00                                                              | 64.29                  | 35.71                                                              |
| <b>PD ST AVERAGE [seconds]</b>   | 0.99  | 0.05 | n.a.               | n.a.                                                              | n.a.                   | n.a.                                                               |
| <b>PD ST AFTER [seconds]</b>     | 1.01  | 0.05 | 0.0005             | 7.14                                                              | 64.29                  | 28.57                                                              |

ATX – patients with ataxia; ET – patients with essential tremor; HE – healthy elderly; MD – neurological disorders with motor impairment; PD – patients with Parkinson’s disease; SL – stride length; ST – stride time; StD – standard deviation; *n.a.* – *not applicable, as comparisons of strides BEFORE and AFTER turns were made against averages of all strides.*

**Supplementary Table 5** –Number of gait cycles needed to reach a correlation coefficient of  $R>0.8$  compared to 32 gait cycles in subjects with movement disorders (MD) and healthy elderly (HE) per disease subgroups AFTER omission of one additional stride before and after turns.

|                                    | <b>N to reach R&gt;0.8</b> | <b>Average at n<sup>th</sup> GC (<math>\pm</math> SD)</b> | <b>Number (%) of subjects with increased CoV (<math>&gt;2.6\%</math>) at n</b> | <b>Average parameter after 32 GC (<math>\pm</math> SD)</b> | <b>Number (%) of subjects with increased CoV (<math>&gt;2.6\%</math>) at 32 GC</b> |
|------------------------------------|----------------------------|-----------------------------------------------------------|--------------------------------------------------------------------------------|------------------------------------------------------------|------------------------------------------------------------------------------------|
| <b>HE Stride length [%stature]</b> | 3                          | 86.48 $\pm$ 4.99                                          | n.a.                                                                           | 86.25 $\pm$ 4.81                                           | n.a.                                                                               |
| <b>HE CoV Stride length</b>        | 25                         | 1.69% $\pm$ 0.60                                          | 9/162 (5%)                                                                     | 1.80 % $\pm$ 0.67                                          | 17/162 (10%)                                                                       |
| <b>HE Stride time [seconds]</b>    | 3                          | 1.029 $\pm$ 0.07                                          | n.a.                                                                           | 1.019 $\pm$ 0.062                                          | n.a.                                                                               |
| <b>HE CoV Stride time</b>          | 17                         | 1.70% $\pm$ 0.66                                          | 13/162 (8%)                                                                    | 1.91 % $\pm$ 0.70                                          | 22/162 (14%)                                                                       |
| <b>MD Stride length [%stature]</b> | 3                          | 77.17 $\pm$ 6.77                                          | n.a.                                                                           | 77.32 $\pm$ 6.84                                           | n.a.                                                                               |
| <b>MD CoV Stride length</b>        | 5                          | 2.70% $\pm$ 2.04                                          | 10/31 (32%)                                                                    | 3.01 % $\pm$ 2.05                                          | 12/31 (39%)                                                                        |
| <b>MD Stride time [seconds]</b>    | 3                          | 1.02 $\pm$ 0.10                                           | n.a.                                                                           | 1.026 $\pm$ 0.11                                           | n.a.                                                                               |
| <b>MD CoV Stride time</b>          | 6                          | 2.56% $\pm$ 2.0                                           | 12/31 (38%)                                                                    | 2.87 % $\pm$ 2.06                                          | 10/31 (32%)                                                                        |
| <b>ATA Stride length[%stature]</b> | 3                          | 76.18 $\pm$ 7.46                                          | n.a.                                                                           | 76.60 $\pm$ 6.82                                           | n.a.                                                                               |
| <b>ATA CoV Stride length</b>       | 5                          | 4.45% $\pm$ 3.39                                          | 5/7 (71%)                                                                      | 5.07 % $\pm$ 3.00                                          | 5/7 (71%)                                                                          |
| <b>ATA Stride time [seconds]</b>   | 3                          | 1.09 $\pm$ 0.14                                           | n.a.                                                                           | 1.11 $\pm$ 0.18                                            | n.a.                                                                               |
| <b>ATA CoV Stride time</b>         | 5                          | 4.44% $\pm$ 2.27                                          | 4/7 (57%)                                                                      | 5.08 % $\pm$ 3.27                                          | 4/7 (57%)                                                                          |
| <b>ET Stride length [%stature]</b> | 3                          | 78.22 $\pm$ 6.58                                          | n.a.                                                                           | 78.79 $\pm$ 6.37                                           | n.a.                                                                               |
| <b>ET CoV Stride length</b>        | 16                         | 2.28% $\pm$ 0.64                                          | 4/12 (33%)                                                                     | 2.28 % $\pm$ 0.87                                          | 4/12 (33%)                                                                         |
| <b>ET Stride time [seconds]</b>    | 3                          | 1.019 $\pm$ 0.076                                         | n.a.                                                                           | 1.01 $\pm$ 0.07                                            | n.a.                                                                               |
| <b>ET CoV Stride time</b>          | 5                          | 2.24% $\pm$ 1.12                                          | 6/12 (50%)                                                                     | 2.37 % $\pm$ 0.66                                          | 3/12 (25%)                                                                         |
| <b>PD Stride length [%stature]</b> | 3                          | 76.69 $\pm$ 6.38                                          | n.a.                                                                           | 76.28 $\pm$ 7.03                                           | n.a.                                                                               |
| <b>PD CoV Stride length</b>        | 6                          | 2.01% $\pm$ 1.04                                          | 2/12 (17%)                                                                     | 2.54 % $\pm$ 1.35                                          | 3/12 (25%)                                                                         |
| <b>PD Stride time [seconds]</b>    | 3                          | 0.98 $\pm$ 0.05                                           | n.a.                                                                           | 0.99 $\pm$ 0.05                                            | n.a.                                                                               |
| <b>PD CoV Stride time</b>          | 9                          | 1.92% $\pm$ 0.77                                          | 2/12 (17%)                                                                     | 2.07 % $\pm$ 0.71                                          | 3/12 (25%)                                                                         |

ATX – patients with ataxia, CoV – coefficient of variation; ET – patients with essential tremor; GC – gait cycle; HE – healthy elderly; MD – neurological disorders with motor impairment; PD – patients with Parkinson’s disease; SD – standard deviation
